# Supplementary material for: Scd-1 deficiency promotes the differentiation of CD8+ T effector
Source: Frontiers journal article supplement (doi:10.3389/fcimb.2024.1325390), 2024-02-06
Supplement: Data_Sheet_2.xls [file Data_Sheet_2.xls]

## Sheet: FIGURE1
FIGURE1A. Saturated fatty acids	Tnaive			Teff			Tmem
12:0	881.22	894.24	1136.54	969.63	817.79	763.67	708.1	675.98	756.96
14:0	1412.37	1517.95	1730.78	2017.7	1823.43	2095.06	1507.46	1021.82	1250.89
16:0	6554.25	4515.27	5671.69	5432.02	4263.51	4529.61	4495.21	3880.48	4453.17
18:0	9794.48	7993.71	11046	9983.84	7662.17	5726.39	7965.21	7716.85	8280.09
20:0	186.27	244.06	345.91	504.24	402.85	287.05	277.08	378.53	224.1
22:0	122.86	74.17	17.98	383.94	400.59	79.7	51.34	46.19	18.89
24:0	32.29	0	30.61	171.95	67.97	49.37	84.06	0	0
FIGURE1B. Monounsaturated fatty acids	Tnaive			Teff			Tmem
14:1	35.04	14.4	12.96	83.42	91.6	41.68	11.35	15.27	13.93
16:1	169.08	333.43	483.92	1598.11	1498.07	1309.12	85.02	112.12	112.38
18:1	865.21	406.93	759.65	9432.19	8582.97	10073.8	1141.73	1237.12	1739.75
20:1	66.09	48.53	185.52	414.82	290.31	224.59	51.95	89.97	121.52
22:1	13.82	20.57	17.04	99.03	56.97	38.61	11.62	20.59	13.38
24:1	30	34.47	25	1014.58	821.93	277.43	59.94	122.48	285.34
FIGURE1C. Oleic acd	Tnaive			Teff			Tmem
Oleic acd	865.21	406.93	759.65	9432.19	8582.97	10073.8	1141.73	1237.12	1739.75
FIGURE1D. Palmitoleic acid	Tnaive			Teff			Tmem
Palmitoleic acid	169.08	333.43	483.92	1598.11	1498.07	1309.12	85.02	112.12	112.38
FIGURE1E. Scd-1	Tnaive			Teff			Tmem
Scd-1	1.1	1.01	0.98	15.12	14.1	15.9	3.92	5.2	6.3
FIGURE1F. Scd-2	Tnaive			Teff			Tmem
Scd-2	1.01	1.12	0.99	12.96	12.3	14.44	5.95	5.62	5.4
FIGURE1G. Polyunsaturated fatty acids	Tnaive			Teff			Tmem
18:2	258.66	162.36	325.39	495.07	312.02	317.79	54.96	83.06	165.68
20:3	39.24	29.75	117.51	45.01	35.6	44.82	18.35	16.28	16.76
20:4	566.56	340.7	835.07	87.86	82.29	104.41	72.86	120.62	99.6
20:5	21.48	12.14	43.69	70.25	74.63	88.42	52.22	101.9	65.65
22:4	279.05	218.84	992.2	13.39	19.1	25.74	18.55	26.3	29.33
22:5	61.5	42.38	196.91	99.82	80.52	108.54	59.22	99.12	47.74
22:6	386.94	256.38	1167.4	114.53	123.07	202.22	122.12	181.68	156.08
24:2	7538.89	5503.9	7749.11	1131.47	1145.81	1586.55	554.36	709.53	977.35

## Sheet: FIGURE2
FIGURE2B. CD3+CD4+T	WT					Scd-1-/-
percentage of CD4+T(%)	51.8	51.3	50	46.6	49.8	47.3	45.8	46.8	55.8	51.6
FIGURE2B. CD3+CD8+ T	WT					Scd-1-/-
percentage of CD8+T(%)	31.8	35.7	38.5	41.3	35.7	34.2	32.7	40	29.4	33.5
FIGURE2B. Tnaive	WT					Scd-1-/-
percentage of Tnaive(%)	30.11	20.3	21.8	26.7	23.8	9.4	6.95	4.89	6.05	8.58
FIGURE2B. Teff	WT					Scd-1-/-
percentage of Teff(%)	17.3	19.9	18.3	12.4	13.8	35.3	38.7	41.8	41.2	36.7
FIGURE2B. Tmem	WT					Scd-1-/-
percentage of Tmem(%)	1.23	1.33	1	2.34	2.19	10.45	11.67	12.8	12.2	12.8
FIGURE2C. GZMA	WT					Scd-1-/-						FIGURE2C. GZMA	WT					Scd-1-/-
MFI	221	234	243	240	221	293	260	303	313	322		mRNA relative expression	1.09	1.02	1.1	1.02	1	1.9	2.5	2.35	2.42	2.1
FIGURE2C. GZMB	WT					Scd-1-/-						FIGURE2C. GZMB	WT							Scd-1-/-
MFI	159	163	166	172	171	186	182	210	197	180		mRNA relative expression	1.05	0.92	1.2	0.98	1.01	4	2.7	3.2	2.23	4.1
FIGURE2C. GZMC	WT					Scd-1-/-						FIGURE2C. GZMC	WT							Scd-1-/-
MFI	574	589	587	563	592	691	654	646	699	639		mRNA relative expression	1	0.98	0.88	0.92	1.1	3.4	5.7	4.14	3.1	5.09
FIGURE2C. PRF	WT					Scd-1-/-						FIGURE2C. PRF	WT							Scd-1-/-
MFI	558	572	527	568	546	864	892	802	956	787		mRNA relative expression	1.03	1.1	0.99	1	0.99	2.9	1.7	2.53	3.12	2.81
FIGURE2C. IFN-Y	WT					Scd-1-/-						FIGURE2C. IFN-Y	WT							Scd-1-/-
MFI	259	286	265	279	291	378	337	341	312	314		mRNA relative expression	1.05	1.12	0.97	0.99	1.02	1.97	2.26	2.27	2.31	2.12

## Sheet: FIGURE3
FIGURE3G. Tnaive	WT			Scd-1-/-
MFI	5062	4736	5249	2639	3326	2710
FIGURE3H. Tnaive	WT			Scd-1-/-
MFI	1062	736	849	439	326	510
FIGURE3I. Tnaive	WT			Scd-1-/-
MFI	262	436	249	639	526	710
FIGURE3B. Lymphocyte differentiation	WT			Scd-1-/-				FIGURE3C. T cell differentiation	WT			Scd-1-/-				FIGURE3D. Cytolysis	WT			Scd-1-/-				FIGURE3E. T cell proliferation	WT			Scd-1-/-
Tcf7	0.282286	1.33489	0.960277	-0.82852	-0.86032	-0.88862		Tcf7	0.282286	1.33489	0.960277	-0.82852	-0.86032	-0.88862		Gzma	-0.73553	-0.69276	-1.0815	0.225579	0.868458	1.41575		Cd81	-0.14863	1.16592	1.3231	-0.94765	-0.70108	-0.69167
Ccr7	-0.55634	1.30547	1.26703	-0.80345	-0.60541	-0.6073		Ccr7	-0.55634	1.30547	1.26703	-0.80345	-0.60541	-0.6073		Gzmc	-0.73737	-0.71145	-0.71249	-0.39941	1.23408	1.32665		Ccr7	-0.55634	1.30547	1.26703	-0.80345	-0.60541	-0.6073
Cd74	-0.01077	0.823199	1.55907	-0.8964	-0.7325	-0.74259		Cd74	-0.01077	0.823199	1.55907	-0.8964	-0.7325	-0.74259		Gzmd	-0.67134	-0.6585	-0.64653	-0.60463	1.26481	1.31619		Slfn1	-0.2643	1.61747	0.834013	-0.75632	-0.60905	-0.82181
H2-DMa	0.878252	0.963191	0.738203	-0.26147	-1.14087	-1.1773		H2-DMa	0.878252	0.963191	0.738203	-0.26147	-1.14087	-1.1773		Gzme	-0.66938	-0.66287	-0.6489	-0.60002	1.28054	1.30063		Cd24a	0.892721	0.191455	1.33939	-0.28912	-0.99335	-1.1411
Tespa1	-0.20636	1.34856	1.14132	-1.01671	-0.62676	-0.64004		Tespa1	-0.20636	1.34856	1.14132	-1.01671	-0.62676	-0.64004		Gzmf	-0.67679	-0.65755	-0.63998	-0.60237	1.19487	1.38183		Anxa1	-0.65894	-0.98515	-0.90516	0.24214	0.986264	1.32084
Nfam1	1.07431	1.42303	-0.18135	-0.772	-0.772	-0.772		Tox	-0.18227	0.744985	1.65422	-0.89031	-0.62632	-0.7003		Gzmg	-0.67928	-0.67395	-0.66094	-0.56536	1.26831	1.31122		Havcr2	-0.60762	-1.08764	-0.99677	0.756468	0.901243	1.03432
Tox	-0.18227	0.744985	1.65422	-0.89031	-0.62632	-0.7003		Fas	0.657528	0.765442	1.24417	-1.05458	-0.90996	-0.7026		Prf1	-0.73454	-1.02805	-0.93409	0.631903	1.03929	1.02549		Cdkn2a	-0.62629	-0.97537	-0.92895	0.182737	1.21766	1.13021
Fas	0.657528	0.765442	1.24417	-1.05458	-0.90996	-0.7026		Tnfsf8	-0.41567	0.78149	1.64783	-0.98696	-0.51524	-0.51146										Ccr2	-0.24621	-1.23878	-1.07501	0.649916	0.990902	0.91918
Cd24a	0.892721	0.191455	1.33939	-0.28912	-0.99335	-1.1411		Anxa1	-0.65894	-0.98515	-0.90516	0.24214	0.986264	1.32084										Lgals3	0.026464	-1.03085	-1.08964	1.62332	0.194142	0.276567
Tnfsf8	-0.41567	0.78149	1.64783	-0.98696	-0.51524	-0.51146		Cdkn2a	-0.62629	-0.97537	-0.92895	0.182737	1.21766	1.13021
Lyl1	-0.27078	1.82187	0.473528	-0.65849	-0.7739	-0.59222		Eomes	-0.92118	-0.80912	-0.83204	0.220881	1.25585	1.0856
Anxa1	-0.65894	-0.98515	-0.90516	0.24214	0.986264	1.32084		Fcer1g	-0.82674	-0.71449	-0.64318	-0.35899	1.15125	1.39214
Cdkn2a	-0.62629	-0.97537	-0.92895	0.182737	1.21766	1.13021		Il18r1	-0.63758	-1.096	-0.91076	0.494922	1.13732	1.0121
Eomes	-0.92118	-0.80912	-0.83204	0.220881	1.25585	1.0856		Ccr2	-0.24621	-1.23878	-1.07501	0.649916	0.990902	0.91918
Fcer1g	-0.82674	-0.71449	-0.64318	-0.35899	1.15125	1.39214		Clec4e	-1.00849	-1.00849	-0.69535	0.851347	1.04435	0.816645
Il18r1	-0.63758	-1.096	-0.91076	0.494922	1.13732	1.0121		Txk	-0.12658	-1.20757	-1.17255	0.868298	0.984672	0.653728
Ccr2	-0.24621	-1.23878	-1.07501	0.649916	0.990902	0.91918		Pik3r6	-0.543	-1.14181	-0.92589	0.518401	1.25416	0.838137
Id2	-0.81513	-0.80459	-0.61066	-0.30751	1.28129	1.2566
Clec4e	-1.00849	-1.00849	-0.69535	0.851347	1.04435	0.816645
Txk	-0.12658	-1.20757	-1.17255	0.868298	0.984672	0.653728
Pik3r6	-0.543	-1.14181	-0.92589	0.518401	1.25416	0.838137

## Sheet: FIGURE4
FIGURE4A. percentage of Teff(%)	WT	SCD-1-/-	SCD-1-/-+OA	SCD-1-/-+SA	SCD-1-/-+PO	SCD-1-/-+PA
	56	75.4	68.2	72.2	72.9	73.3
	44.2	76	63	75.1	67.9	66.3
	44.6	76.3	54.8	74.7	74.7	75.1
FIGURE4C. GZMA	WT	SCD-1-/-	SCD-1-/-+OA	SCD-1-/-+SA	SCD-1-/-+PO	SCD-1-/-+PA
	811	2593	747	2613	2475	3626
	796	2402	782	2614	2508	3487
	1654	2706	1735	2941	2916	3133
FIGURE4C. GZMB	WT	SCD-1-/-	SCD-1-/-+OA	SCD-1-/-+SA	SCD-1-/-+PO	SCD-1-/-+PA
	811	1593	947	1413	1475	1626
	796	1402	1082	1614	1508	1487
	654	1706	1235	1941	1916	133
FIGURE4C. GZMC	WT	SCD-1-/-	SCD-1-/-+OA	SCD-1-/-+SA	SCD-1-/-+PO	SCD-1-/-+PA
	811	1493	1047	1613	1475	1226
	796	1302	982	1614	1208	1487
	754	1506	935	1441	1316	1333
FIGURE4C. PRF	WT	SCD-1-/-	SCD-1-/-+OA	SCD-1-/-+SA	SCD-1-/-+PO	SCD-1-/-+PA
	949	2367	1425	2550	2218	2558
	946	2104	1387	2475	2249	2454
	976	1950	1412	2334	2347	2567
FIGURE4C. IFN-γ	WT	SCD-1-/-	SCD-1-/-+OA	SCD-1-/-+SA	SCD-1-/-+PO	SCD-1-/-+PA
	849	1567	1125	1550	1218	1558
	846	1604	1087	1475	1249	1454
	800	1530	999	1412	1345	1509
FIGURE4C. TCF1	WT	SCD-1-/-	SCD-1-/-+OA	SCD-1-/-+SA	SCD-1-/-+PO	SCD-1-/-+PA
	1549	867	1025	870	890	800
	1446	804	1087	900	810	820
	1398	783	1109	857	878	831

## Sheet: FIGURE5
FIGURE5A. OCR
Time (minutes)	WT							SCD-1-/-							SCD-1-/-+OA							SCD-1-/-+SA							SCD-1-/-+PO							SCD-1-/-+PA
1.30899	109.489	102.599	125.02	124.673	123.502	111.168	114.984	142.818	149.708	161.04	163.415				69.3372	74.7834	88.9416	89.0231	77.6335	74.0328	81.7662	61.6545	61.0589	48.282					77.8889	69.6705	79.2935	69.8267	74.7765	66.4996		75.8019	78.4764	74.1745	60.3097
7.78444	107.567	99.0451	115.625	115.696	119.362	105.073	111.144	135.14	145.522	157.408	155.475				66.6587	71.3146	82.2839	84.3044	74.407	71.2184	77.2513	67.0613	60.923	49.3639					77.4439	68.9995	75.1256	68.6106	72.1037	65.7055		74.5487	77.6361	73.1999	57.1852
14.2583	107.087	98.969	113.742	115.054	117.461	103.321	111.68	134.391	149.366	159.133	157.611				64.8597	68.0048	78.5406	83.5103	71.5733	69.169	74.5634	64.2793	61.5781	49.5506					76.5159	68.8681	73.2491	68.5947	72.4623	66.9068		75.5803	77.6234	73.6861	57.6
20.8126	40.4641	31.407	39.1878	40.9769	41.9216	37.2389	37.4208	54.9519	63.6342	69.4502	66.666				23.2746	23.1015	25.0501	27.9768	24.4235	23.4611	25.2895	36.0255	22.6263	20.5413					30.7982	24.5698	30.4325	30.0614	29.3659	28.2241		35.3496	35.9271	32.2128	22.2782
27.2826	41.2296	33.1261	40.0446	43.6452	43.2328	39.2634	39.8302	52.0325	60.5648	66.6871	64.0338				24.182	26.0935	25.2377	29.7248	25.127	24.3156	25.9811	33.6434	25.6799	20.733					26.28	26.4483	31.8832	28.1703	29.4779	28.1423		34.2466	34.6136	29.465	20.571
33.7506	46.3559	38.2808	44.9643	47.9745	47.476	40.122	43.5048	52.1416	60.6977	66.7132	65.806				25.8622	29.3992	28.0405	32.1558	27.3599	23.5807	28.8809	33.6179	27.0821	23.9666					25.0808	28.5184	32.5385	29.2495	29.2185	28.9567		35.0198	35.491	28.3039	22.201
40.2996	158.976	177.875	215.196	215.57	201.246	179.39	219.115	148.182	184.446	202.305	178.006				119.628	116.647	110.594	132.103	125.478	115.285	106.592	81.2378	87.5171	92.904					81.9022	97.2395	86.8619	86.9703	76.1476	70.1614		141.055	119.727	123.277	97.1541
46.7696	186.318	219.807	239.604	251.527	223.864	192.327	221.114	168.065	195.11	219.616	199.192				136.95	134.693	139.799	163.441	145.641	135.423	132.496	96.1782	115.002	118.515					98.8731	110.8	102.711	102.407	99.629	77.409		164.888	142.467	150.582	117.08
53.2422	211.436	240.659	249.671	257.213	228.475	194.431	222.181	187.134	210.92	240.358	215.317				145.134	141.659	145.692	167.356	146.102	137.891	138.257	98.0744	126.798	127.515					108.821	118.474	111.168	110.367	110.044	80.2175		177.525	153.487	161.807	131.398
59.7963	34.0367	21.0337	26.8543	22.8636	25.9147	22.2443	22.956	39.2493	41.6582	46.6331	44.677				15.7642	18.7098	15.8963	19.3365	14.9089	12.928	16.086	26.099	15.4933	13.9327					19.7484	20.2204	22.9053	20.4451	20.2665	23.8123		24.5361	26.7919	21.2325	17.8214
66.2708	28.1783	22.705	28.5664	26.7302	27.4345	23.8217	24.9888	36.4767	40.0769	45.1754	42.1668				17.0143	19.8311	18.0403	19.4956	17.3339	14.1579	17.083	25.6456	16.5782	16.6232					19.7893	20.4016	22.6353	20.3104	21.0151	23.5378		24.3885	26.3481	23.3439	17.8406
72.7448	32.8833	21.1279	27.3837	26.1843	26.206	22.1895	24.775	34.4966	36.8558	43.2304	39.4655				15.8934	18.4916	16.226	18.7634	15.8465	13.9232	15.7161	25.9779	16.9657	15.6587					17.2107	17.9996	20.2622	18.1138	18.7129	21.2039		23.2907	25.0503	21.7259	16.6103
FIGURE5A. ECAR
Time (minutes)	WT							SCD-1-/-							SCD-1-/-+OA							SCD-1-/-+SA							SCD-1-/-+PO							SCD-1-/-+PA
1.30899	22.9657	27.276	29.876	29.1575	31.3663	30.1372	34.2378	46.135	44.6406	51.2097	47.4209				27.0866	22.8298	30.1019	27.9763	29.4022	29.7382	26.7349	20.4202	27.3837	23.1534					33.0801	28.8722	30.4384	28.9373	31.8443	21.3076		24.0641	26.0435	28.9686	21.8848
7.78444	22.5623	27.1771	29.0487	26.4708	28.5082	24.3403	32.5966	43.7698	42.0582	48.3732	47.7002				26.9157	23.1673	27.0465	26.5976	27.6351	28.125	26.8128	17.674	26.8877	21.8778					34.8312	29.3852	28.1283	20.0263	28.0367	20.614		23.5468	26.3517	29.8634	22.6517
14.2583	23.0954	27.7361	29.4991	27.5841	30.1568	27.0608	34.3236	46.141	44.0496	50.5557	52.154				28.2589	24.3034	28.1647	27.9428	28.518	29.9056	28.5894	18.5882	29.0089	24.3252					37.6388	31.2922	29.0881	23.5656	30.5196	21.7249		25.8627	25.2703	30.9822	23.6044
20.8126	41.0264	50.633	53.1431	60.4817	56.7023	52.2979	62.0477	82.7645	79.6911	92.1782	93.9486				50.4092	45.5344	52.5201	52.8836	54.4436	56.1841	53.1257	33.8682	59.4946	50.9785					68.5122	54.9474	59.4328	50.2983	58.4814	41.1954		50.5952	50.352	58.2702	43.2071
27.2826	52.1085	61.1145	61.7514	70.7496	68.6154	63.1668	73.3631	91.0924	83.4765	97.2534	101.864				54.3976	48.6496	54.2361	55.865	55.1889	57.4831	55.1341	37.1559	64.0126	55.1373					74.6087	59.7729	61.3644	53.9899	62.3098	42.778		57.366	55.7105	60.226	46.5613
33.7506	51.6478	66.2389	65.8256	76.1079	73.4541	66.8596	76.8826	94.6485	86.7896	100.567	106.49				55.793	50.4317	54.3276	57.6294	56.1915	57.5288	55.9527	38.6987	66.1634	57.5627					72.1761	60.7357	63.1691	57.0178	64.4855	43.1674		60.2244	58.554	62.0759	49.0724
40.2996	50.224	73.8544	73.6226	80.9423	77.1625	69.8702	80.9836	91.8745	88.4742	99.022	100.204				54.5538	49.3559	54.95	54.6864	57.086	54.8613	53.7757	38.342	58.9936	55.6911					63.6385	55.8314	66.2843	58.897	67.4735	42.6212		60.499	65.4823	67.7038	56.497
46.7696	55.3691	74.0407	70.2076	79.8579	79.0013	71.504	79.1701	96.1173	90.8386	100.632	109.069				59.365	52.5293	55.2539	59.1383	57.6062	56.8176	55.6798	41.2421	65.8731	59.4628					80.104	63.1056	69.394	66.9024	76.8981	45.755		65.0262	68.4556	68.0441	60.7569
53.2422	58.1877	74.2266	69.4659	78.7275	79.1244	71.3782	78.2197	96.4754	89.2616	100.015	110.247				60.8824	53.3413	54.4504	60.0384	56.7109	56.8952	54.9169	41.8941	67.5582	59.7368					87.5589	63.7506	69.0674	69.6973	79.7459	45.9418		66.6728	68.4111	68.7648	63.4084
59.7963	56.6384	92.7426	94.1679	86.9238	81.3745	80.254	82.1518	124.555	109.705	129.14	130.287				55.9883	51.8561	55.9714	61.3032	56.0602	57.2649	55.5422	41.6244	78.8172	63.4451					85.0034	65.8255	70.6917	72.3384	83.6401	58.1164		62.3558	70.3982	74.3328	80.7319
66.2708	50.094	90.5976	92.8382	87.8907	82.9509	81.6623	82.9656	123.747	108.347	127.089	130.279				56.0169	51.4586	53.5985	61.3683	55.5514	55.7071	54.2832	41.3619	78.8884	63.6608					89.7451	61.8894	68.0279	73.7412	84.59	58.0618		63.939	70.2818	71.9974	80.2251
72.7448	45.2748	90.2408	93.0952	88.1185	83.4649	82.7148	82.7958	121.529	106.307	124.573	129.321				54.0707	51.0652	52.5938	60.6746	54.9102	55.0552	53.343	41.3819	77.9896	63.7546					82.798	59.3233	67.2678	74.5007	84.5115	58.0061		63.6049	70.0542	72.0801	81.107
FIGURE5B. Basal Respiration	WT	SCD-1-/-	SCD-1-/-+OA	SCD-1-/-+SA	SCD-1-/-+PO	SCD-1-/-+PA
	73.05	112.51	49.29	38.18	59.31	52.29
	77.94	115.9	62.64	46.08	50.87	52.57
	86.89	118.15	64.17	35.62	52.99	51.96
	92.19	99.89	56.66	47.07	50.48	40.99
	91.55		56.24		53.75
	81.08		58.48		45.7
	88.72
FIGURE5C. ATP Production	WT	SCD-1-/-	SCD-1-/-+OA	SCD-1-/-+SA	SCD-1-/-+PO	SCD-1-/-+PA
	66.62	82.36	44.9	28.25	50.24	41.33
	67.56	88.8	53.49	38.95	42.42	43.01
	74.55	92.45	55.53	29.01	41.37	44.22
	74.08	93.58	47.15		40.42	37.03
	75.54		45.71		42.98
	66.08		49.27		38.76
	74.26
FIGURE5D. Maximal Respiration	WT	SCD-1-/-	SCD-1-/-+OA	SCD-1-/-+SA	SCD-1-/-+PO	SCD-1-/-+PA
	177.4	152.64	122.95	71.98	91.61	154.23
	219.62	174.06	129.8	111.31	100.47	128.44
	222.82	197.13	148.02	113.58	90.91	140.08
	234.35	175.85	131.19		92.25	114.79
	202.56		124.96		91.33
	172.19		122.17
	199.23
FIGURE5E. Spare Respiratory Capacity	WT	SCD-1-/-	SCD-1-/-+OA	SCD-1-/-+SA	SCD-1-/-+PO	SCD-1-/-+PA
	104.35	52.74	73.65	33.8	49.61	75.86
	141.69	61.55	67.15	65.22	37.92	88.12
	135.93	81.23	83.85	77.96	41.77	73.8
	142.16	57.71	74.53		37.58
	111.01		68.72
	110.5		63.69
FIGURE5F. CPT1-α	WT	SCD-1-/-	SCD-1-/-+OA	SCD-1-/-+SA	SCD-1-/-+PO	SCD-1-/-+PA
	3035	4357	2817	4402	4185	3375
	3021	4358	2793	4401	4157	3351
	3565	3918	2672	3829	3304	4232
FIGURE5G. TMRM	WT	SCD-1-/-	SCD-1-/-+OA	SCD-1-/-+SA	SCD-1-/-+PO	SCD-1-/-+PA
	881	1289	1025	1436	1201	1317
	868	1345	1074	1203	1366	1296
	759	1178	1076	1251	1313	1251
FIGURE5H. Bodipy	WT	SCD-1-/-	SCD-1-/-+OA	SCD-1-/-+SA	SCD-1-/-+PO	SCD-1-/-+PA
	13517	17484	23697	15229	16199	13950
	13633	17662	25498	10970	16356	14455
	10175	11049	19114	11967	12635	14142

## Sheet: FIGURE6
FIGURE6A. weight variation																						FIGURE6A. 48h weight variation
Time (h)	WT+LPS					WT+LPS+OA					SCD-1-/-+LPS					SCD-1-/-+LPS+OA						WT+LPS	WT+LPS+OA	SCD-1-/-+LPS	SCD-1-/-+LPS+OA
0	25	25.1	25.2	24.9	25.3	26	25.3	25.5	25.4	25.8	25.3	25.4	25.6	25.7	25.3	26	25.8	25.7	25.8	26		0.14	0.096154	0.237154	0.153846
12	24	24	23.9	23.8	24.2	25.4	24.4	24.8	24.7	24.7	22.9	23.8	24.1	23.9	22.4	25	24.7	24.7	24.5	24.9		0.14741	0.106719	0.23622	0.147287
24	23.1	23	23.1	22.7	22.9	24.7	23.8	24.2	23.7	24.1	21.2	22.3	22.7	22.5	21.8	24	23.9	23.8	23.6	23.4		0.146825	0.098039	0.25	0.151751
36	22.8	22.6	22.7	21.8	22.4	24.2	23.2	23.6	23.3	23.4	20.7	21	20.5	20.4	20.9	23	23.1	22.9	22.7	22.4		0.14229	0.098425	0.22925	0.143411
48	21.5	21.4	21.5	22	21.7	23.5	22.6	23	22.9	22.8	19.3	19.4	19.2	19	19.5	22	22	21.8	22.1	21.9		0.116466	0.11628	0.2607	0.157692
FIGURE6B. Murine sepsis score																						FIGURE6B. Murine sepsis score
Time (h)	WT+LPS					WT+LPS+OA					SCD-1-/-+LPS					SCD-1-/-+LPS+OA						WT+LPS	WT+LPS+OA	SCD-1-/-+LPS	SCD-1-/-+LPS+OA
0	0	0	0	0	0	0	0	0	0	0	0	0	0	0	0	0	0	0	0	0		7	5	11	9
12	3	3	2	3	2	2	2	2	2	3	4	5	4	5	5	3	2	3	3	3		8	6	12	9
24	5	5	4	4	3	3	3	3	3	4	7	7	8	8	9	5	4	5	5	6		7	5	11	10
36	6	6	5	5	4	4	5	4	4	4	9	10	9	9	10	7	7	8	9	8		7	6	12	10
48	7	8	7	7	8	5	6	5	5	6	11	12	11	12	13	9	9	10	10	10		8	5	13	10
FIGURE6C. percentage of Teff(%)
WT+LPS	WT+LPS+OA	SCD-1-/-+LPS	SCD-1-/-+LPS+OA
15.8	2.88	43.1	34.1
11.5	4	42.1	33.6
13.9	4.43	41.5	35.3
12.8	5.4	38.7	30.9
20.5	7.7	35	29.7

## Sheet: FIGURE7
FIGURE7A. TCF1
WT+LPS	WT+LPS+OA	SCD-1-/-+LPS	SCD-1-/-+LPS+OA
575	635	314	438
542	632	378	453
545	638	318	434
521	647	320	431
557	630	387	467
FIGURE7B. GZMA
WT+LPS	WT+LPS+OA	SCD-1-/-+LPS	SCD-1-/-+LPS+OA
248	159	297	229
245	173	277	195
227	156	288	176
220	180	260	180
216	179	243	173
FIGURE7C. GZMB
WT+LPS	WT+LPS+OA	SCD-1-/-+LPS	SCD-1-/-+LPS+OA
143	96.2	208	166
135	106	188	161
147	98.5	204	169
130	86	168	147
127	113	210	183
FIGURE7D. GZMC
WT+LPS	WT+LPS+OA	SCD-1-/-+LPS	SCD-1-/-+LPS+OA
306	243	410	270
304	252	408	271
292	242	358	272
270	232	416	290
259	227	371	229
FIGURE7E. PRF
WT+LPS	WT+LPS+OA	SCD-1-/-+LPS	SCD-1-/-+LPS+OA
265	208	308	231
261	199	316	225
263	214	319	224
246	180	327	208
233	221	314	217
FIGURE7E. IFN-γ
WT+LPS	WT+LPS+OA	SCD-1-/-+LPS	SCD-1-/-+LPS+OA
297	186	479	329
278	218	442	328
269	180	391	319
300	173	387	294
247	166	376	287
FIGURE7G. TNF-α
WT+LPS	WT+LPS+OA	SCD-1-/-+LPS	SCD-1-/-+LPS+OA
487.198	355.744	877.666	608.53
555.862	314.898	840.574	645.964
535.934	420.322	928.602	736.879
446.903	302.952	773.542	606.142
578.642	406.157	820.404	617.407
FIGURE7H. IL-1β
WT+LPS	WT+LPS+OA	SCD-1-/-+LPS	SCD-1-/-+LPS+OA
264.545	209.473	568.619	389.215
282.346	144.107	507.749	395.124
252.574	242.73	476.155	427.298
381.712	186.203	532.316	405.217
332.723	220.389	439.565	437.672
FIGURE7I. IL-6
WT+LPS	WT+LPS+OA	SCD-1-/-+LPS	SCD-1-/-+LPS+OA
451.901	64.961	2254.16	1571.35
508.457	143.874	2498.71	1863.64
645.964	90.916	2531.19	1789.82
489.12	97.548	2054.16	1645.61
477.156	86.1655	1987.35	1597.23
FIGURE7J. IL-10
WT+LPS	WT+LPS+OA	SCD-1-/-+LPS	SCD-1-/-+LPS+OA
597.725	903.946	151.274	315.332
547.844	966.901	146.198	480.396
556.197	896.048	225.7	359.334
411.641	718.052	232.346	340.892
497.37	776.682	190.077	509.944

## Sheet: FIGURE8
FIGURE8A.Day 8 LCMV-Armstrong Sorted Splenocytes
WT+PBS	WT+LCMV	SCD-1-/-+PBS	SCD-1-/-+LCMV
1	153.369	1	68.4122
1.09336	284.093	1.176	52.3849
1.09297	260.512	1.0917	38.0145
1.02343	153.096	0.905561	36.2243
1.08901	85.9201	0.957554	24.1338
FIGURE8B. percentage of Teff(%)
WT+PBS	WT+LCMV	SCD-1-/-+PBS	SCD-1-/-+LCMV
7.56	72.5	15.3	89.4
7.64	75.5	16.3	90.7
7.19	74.6	27.9	91.1
7.45	74.4	28	92.9
6.7	76.3	29.2	90.3
FIGURE8D. GZMA
WT+PBS	WT+LCMV	SCD-1-/-+PBS	SCD-1-/-+LCMV
149	819	241	1035
152	838	238	1043
137	832	219	1003
135	718	274	1007
132	699	255	1006
FIGURE8D. GZMB
WT+PBS	WT+LCMV	SCD-1-/-+PBS	SCD-1-/-+LCMV
108	381	679	864
71.5	389	669	869
61.9	385	598	827
65.8	492	557	893
58.9	481	546	633
FIGURE8D. GZMC
WT+PBS	WT+LCMV	SCD-1-/-+PBS	SCD-1-/-+LCMV
383	663	491	728
360	593	483	826
337	573	480	804
334	561	445	805
220	556	402	723
FIGURE8D. PRF
WT+PBS	WT+LCMV	SCD-1-/-+PBS	SCD-1-/-+LCMV
153	355	252	556
115	330	225	540
107	308	199	448
58.8	282	190	410
41.6	235	183	383
FIGURE8D. IFN-y
WT+PBS	WT+LCMV	SCD-1-/-+PBS	SCD-1-/-+LCMV
88.6	198	127	285
84.6	189	121	231
82.7	183	119	213
81.4	177	112	209
77.7	172	105	202

## Sheet: Supplementary information
SI FIGURE2C	WT					Scd-1-/-
GZMA Positive(%)	8.83	10.9	12.2	12.9	11.7	16.4	20.9	18.2	19.5	17.4
GZMB Positive(%)	2.56	3.59	1.95	2.95	2.81	7.31	5.46	6.48	8.13	5.93
GZMC Positive(%)	20	21	18.9	17.2	22.3	31.9	31.1	28	37.7	33.5
PRF Positive(%)	18.3	20.9	18.8	21.2	19.1	43.2	44	38.3	45.9	40.2
IFN-γ Positive(%)	14.3	14.6	15.7	13.9	14.1	27.4	26.9	25.6	25.2	28.2
SI FIGURE2D	WT					Scd-1-/-
Percentage(%)	18.3	20.9	18.8	21.2	19.1	43.2	44	38.3	45.9	40.2
Dendritic cell(CD45.2+ CD11C+ I-A/I-E+)	2.01288	2.38662	1.19126	1.10244	1.3894	1.57371	1.99377	1.03132	2.14731	1.43473
Neutrophil(CD45.2+ CD11c- CD11b+ Ly6G+)	1.59635	1.93692	2.3476	1.7653	1.6357	1.94634	1.9476	1.53153	2.1763	1.3456
Macrophage(CD45.2+ CD11c- CD11b+ Ly6G- Ly6Clow)	2.06922	3.35172	2.3153	2.4168	2.7136	3.5894	2.1567	2.3372	2.1354	2.2315
Monocyte(CD45.2+ CD11c- CD11b+ Ly6G- Ly6Chigh)	1.08659	1.39374	1.8352	1.5354	1.6543	1.92635	1.2354	1.3476	1.1346	1.4317
NK cell(TCRβ- CD45.2+ Nkp46+ CD49b+)	1.15664	1.09033	1.8613	1.2357	1.5317	1.91338	1.6347	1.2163	1.1357	1.0347
SI FIGURE3. percentage of Teff(%)
WT+PBS	WT+LPS	SCD-1-/-+PBS	SCD-1-/-+LPS
12.6	21.2	18.7	31.9
8.4	18.2	20.4	25.6
10.7	17.5	19.8	28.4
9.1	19.2	23.4	21.9
9.7	16.7	24.6	26.9
